# Supplementary material
Source: publisher figshare collection journal article supplement (https://sage.figshare.com/ndownloader/files/13805936)
Supplement: Supplementary file 1 [file 13805936]

## Pharmacy Survey

The purpose of this survey is to learn about opioid dispensing practices. This survey will take about 10 minutes to complete and is anonymous. Please answer the following questions. We appreciate your help.

1. How long have you been a pharmacist?  
\_\_\_\_\_ (years) \_\_\_\_\_ (months)
2. What is your gender?  
☐ Male  
☐ Female  
Other: \_\_\_\_\_
3. Which type of pharmacy do you work in? (Check all that applies)  
☐ Community chain  
☐ Community independent  
☐ Hospital  
☐ Other (please describe): \_\_\_\_\_
4. What is your role at the pharmacy?  
☐ Pharmacy Manager  
☐ Staff Pharmacist  
☐ Clinical Pharmacist  
☐ Other (please describe): \_\_\_\_\_
5. How would you describe the location of where the pharmacy where you currently work is located?  
☐ Rural  
☐ Suburban  
☐ Urban  
☐ Other (please describe): \_\_\_\_\_
6. What is the zipcode of the pharmacy where you currently work? \_\_\_\_\_
7. Have you ever received any education during pharmacy school on appropriately dispensing opioids?  
☐ Yes  
☐ No
8. Have you ever received any continuing education credit after pharmacy school on appropriately dispensing opioids?  
☐ Yes  
☐ No  
If yes, when? \_\_\_\_\_

9. How often do patients call asking about opioid availability?

- ☐ Never
- ☐ Sometimes
- ☐ Often
- ☐ Always

Comments: \_\_\_\_\_

10. How often do you check the prescription drug-monitoring program prior to filling out a prescription for an opioid?

- ☐ Never
- ☐ Sometimes
- ☐ Often
- ☐ Always

Comments: \_\_\_\_\_

11. How often does your pharmacy experience shortages of long-acting opioids?

- ☐ Never
- ☐ Sometimes
- ☐ Often
- ☐ Always

If so, please explain: \_\_\_\_\_

12. How often does your pharmacy experience shortages of short-acting opioids?

- ☐ Never
- ☐ Sometimes
- ☐ Often
- ☐ Always

If so, please explain: \_\_\_\_\_

13. If opioids are not in stock, how long does it typically take to obtain them to fill a patient prescription?

(# of days): \_\_\_\_\_ Please explain: \_\_\_\_\_

14. How often in the past 30 days have you had to inform patients that you cannot fill their opioid prescription due to shortages?

- ☐ Never
- ☐ Sometimes
- ☐ Often
- ☐ Always

Please explain: \_\_\_\_\_

15. How often in the past 7 days have you had to inform patients that you cannot fill their opioid prescription due to shortages?

- ☐ Never  
☐ Sometimes  
☐ Often  
☐ Always

Please explain: \_\_\_\_\_

16. Which procedures do you follow when a patient comes in to fill a prescription for an opioid? (check all that apply)

- ☐ Contact the prescriber to validate the prescription  
☐ Verify last time prescriber saw the patient  
☐ Ask for the patient's diagnosis  
☐ None of the above  
☐ Other(s): \_\_\_\_\_

17. How do you determine if an opioid prescription is for a legitimate medical reason?

\_\_\_\_\_

\_\_\_\_\_

18. Patients often complain about barriers in obtaining access to opioids. As a pharmacist, which of the following do you think are possible barriers to supplying opioid medications for patients? (Check all that apply)

- ☐ Less demand  
☐ Reduced access due to DEA manufacturer restrictions  
☐ Worries about illicit use  
☐ Risk of overdose  
☐ Difficulty reaching prescriber  
☐ Lack of clinical information (i.e. labs)  
☐ Insurance restrictions/limitations  
☐ Worries about diversion  
☐ Too much paperwork  
☐ Fear of robbery  
☐ Drug disposal regulations  
☐ Other (please describe): \_\_\_\_\_

Which of the above choices do you consider the primary barrier? \_\_\_\_\_

19. Have you ever had to suggest that a patient go to an emergency room for pain medication or relief?

☐ Yes

☐ No

If yes, why? \_\_\_\_\_

20. Have you ever had to suggest that a patient go to another pharmacy for pain medication or relief?

☐ Yes

☐ No

If yes, why? \_\_\_\_\_

21. In the past 30 days, how often have you dispensed an emergency 3-day supply of opioids for cancer patients?

☐ Never

☐ Sometimes

☐ Often

☐ Always

Please explain: \_\_\_\_\_

22. In the past 6 months, how many robberies/break-ins/thefts have there been at the pharmacy where you currently work?

☐ none

☐ 1-3

☐ 4-6

☐ More than 6

☐ I don't know

23. What strategies do you think would be most helpful for improving opioid accessibility for cancer patients with chronic pain?

---

---

*Thank you for completing the survey.*
